# Supplementary material for: A cysteamine-functionalized biomimetic chromotropic hydrogel for naked-eye detection and adsorption of mercury ions
Source: Royal Society of Chemistry journal article supplement (doi:10.1039/d2tc04234g), 2022-12-06
Supplement: d2tc04234g1.pdf [file d2tc04234g1.pdf]

## Supplementary Information

### Cysteamine-functionalized biomimetic chromotropic hydrogel for naked-eye detection and adsorption of mercury ions

Bing Liu, Feng Zhao, Yang Qiu, Wenzhao Liu, Zhaoyang Wu\*

State Key Laboratory of Chemo/Bio-sensing and Chemo-metrics, College of Chemistry and Chemical Engineering,  
Hunan University, Changsha 410082, People's Republic of China

\* Corresponding author. E-mail: [zywu@hnu.edu.cn](mailto:zywu@hnu.edu.cn)

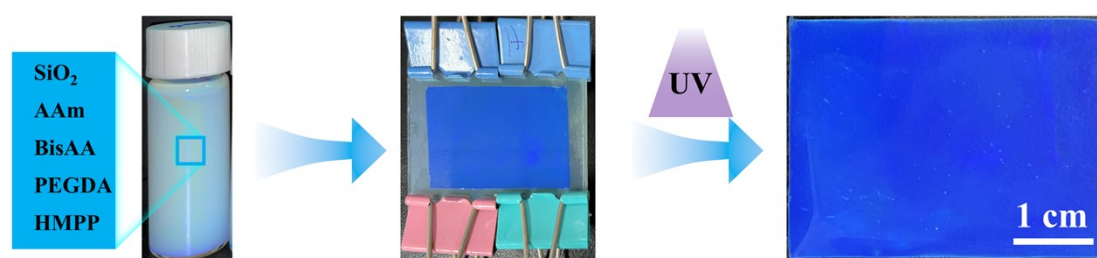

**Figure S1.** The schematic diagram of the preparation of BCH.

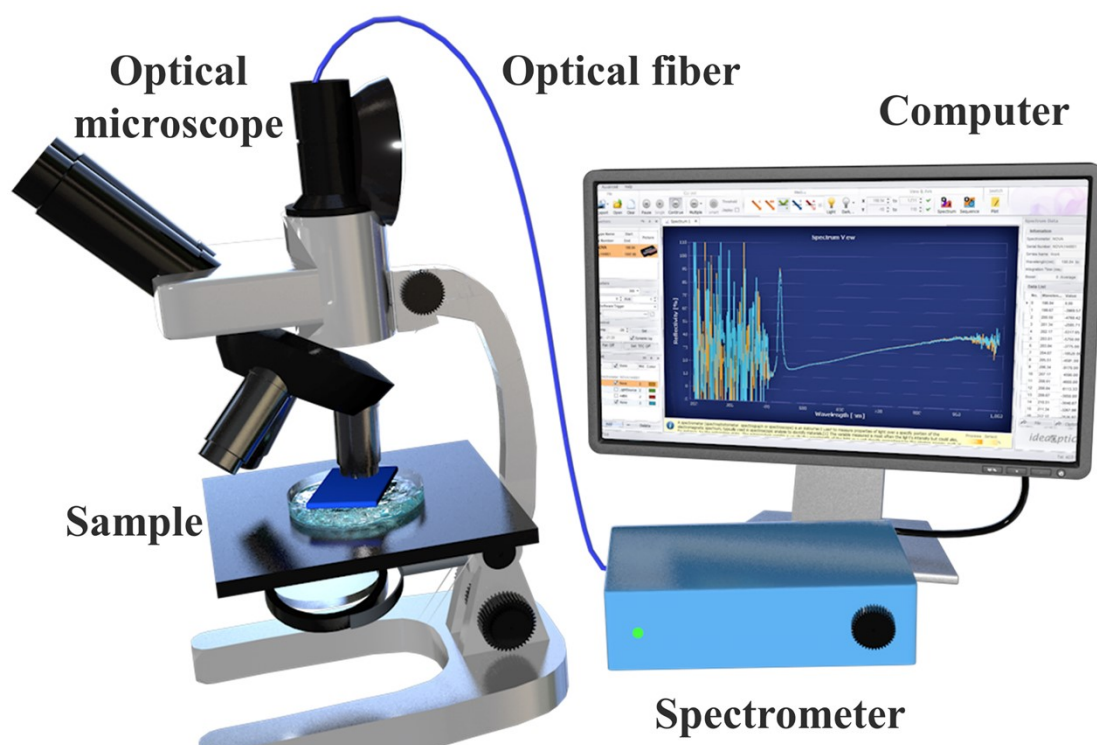

**Figure S2.** The schematic diagram of the reflectance spectrum of a sample tested by a fiber optic spectrometer.

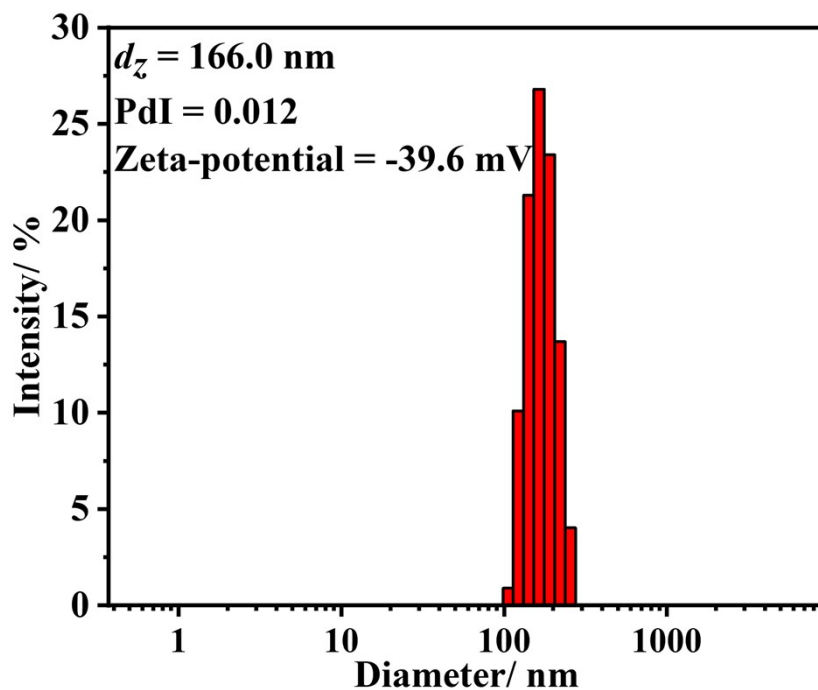

**Figure S3.** The hydrodynamic diameter distribution of SiO<sub>2</sub> nanoparticles in the aqueous solution.

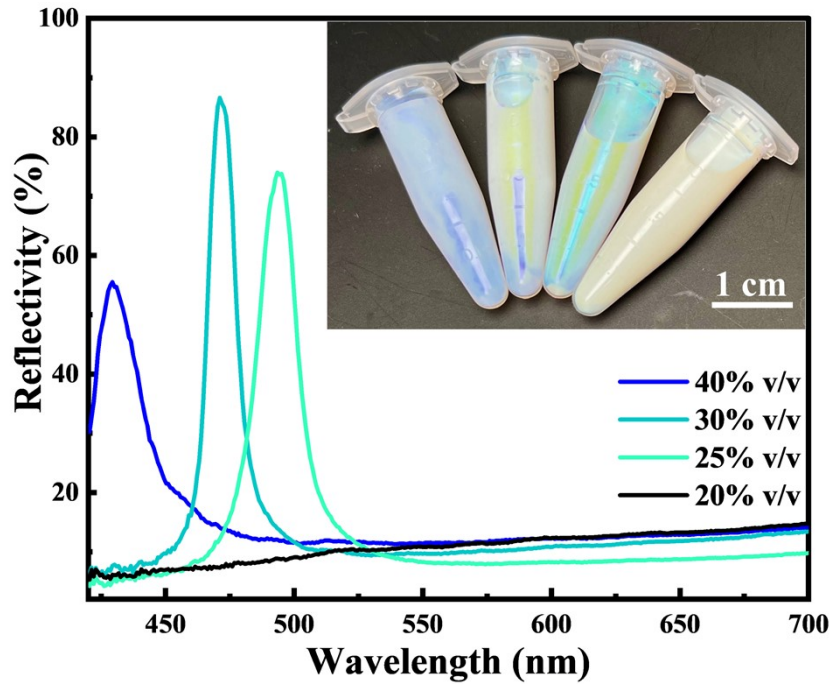

**Figure S4.** Reflection spectra of pre-polymerization solutions with different volume fractions of SiO<sub>2</sub> (the inset is the corresponding digital photo).

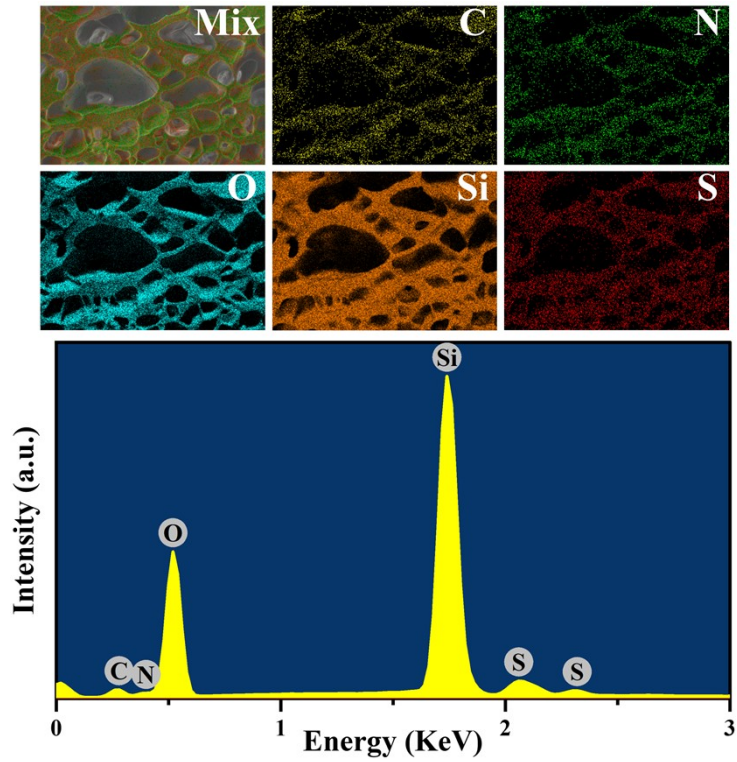

**Figure S5.** Elemental (C, N, O, Si and S) spectra and EDX spectra of Cys-BCH.

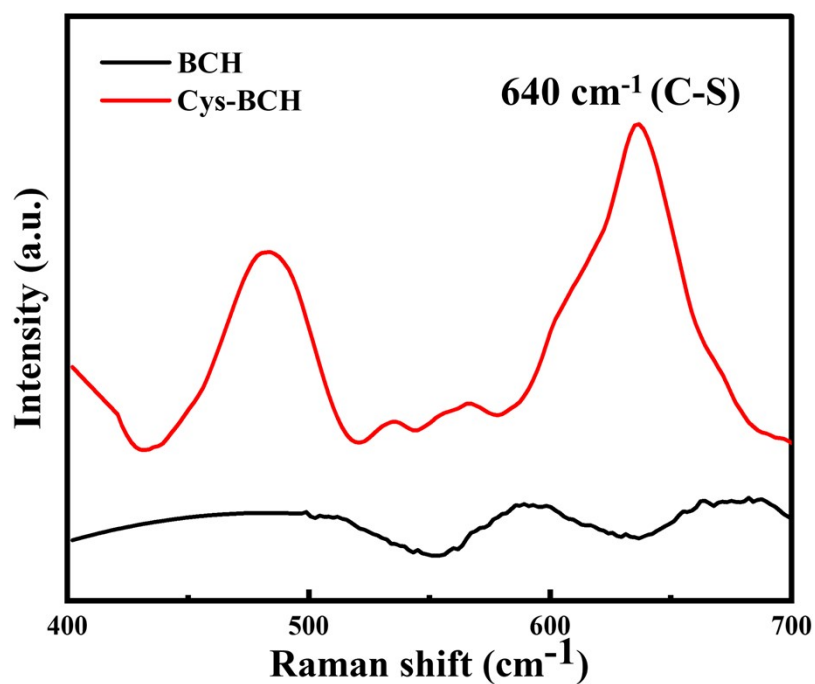

**Figure S6.** Raman spectra of BCH and Cys-BCH.

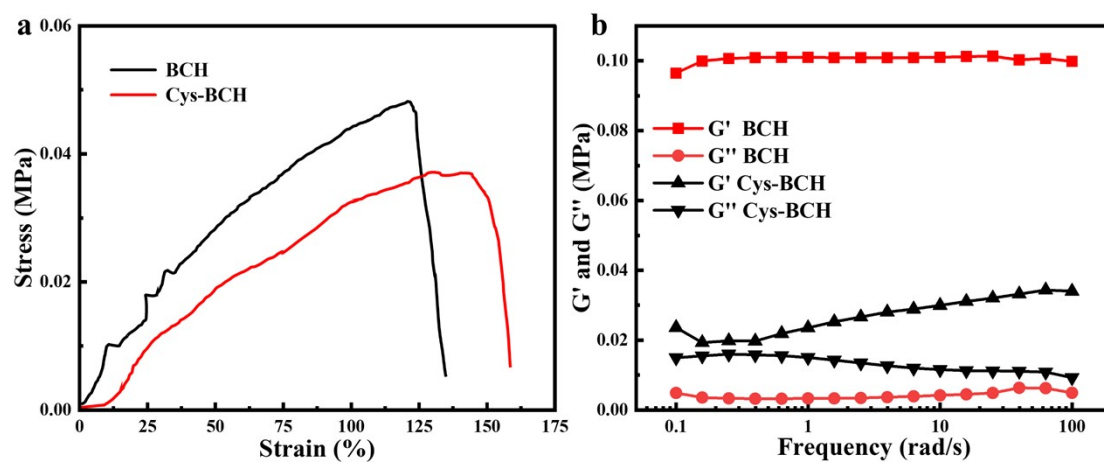

**Figure S7.** Mechanical properties of BCH and Cys-BCH: (a) tensile strain-stress curves and (b) storage modulus ( $G'$ ) and loss modulus ( $G''$ ) as a function of angular frequency.

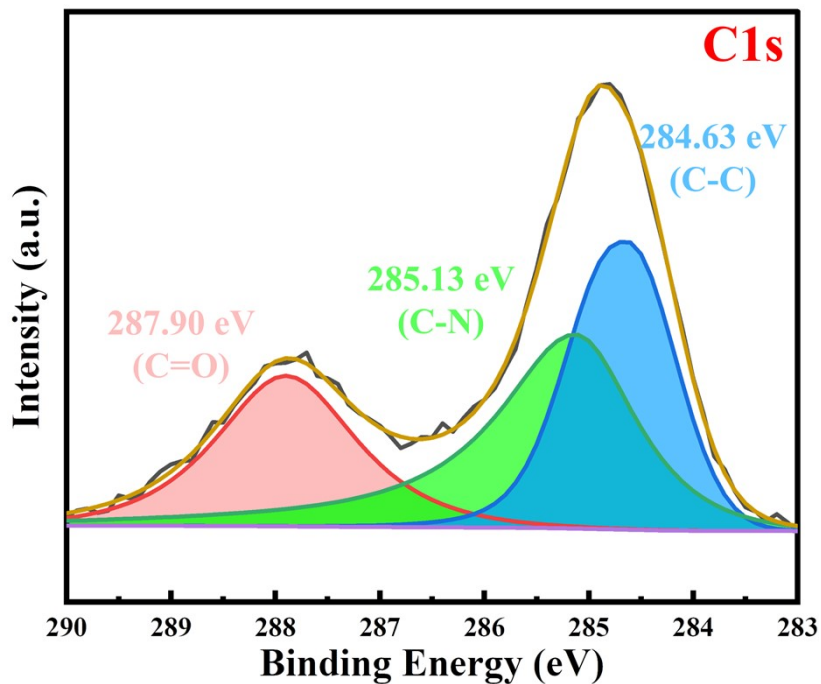

**Figure S8.** The high-resolution XPS spectrum of C 1s on Cys-BCH.

**Table S1.** Different parameters value of kinetics models at a temperature of 303 K.

| Kinetics model      | Parameters | Values |
|---------------------|------------|--------|
| Pseudo-first-order  | $k_1$      | 0.0411 |
|                     | $R^2$      | 0.974  |
|                     | $Q_e$      | 0.0946 |
| Pseudo-second-order | $k_2$      | 0.0180 |
|                     | $R^2$      | 0.999  |
|                     | $Q_e$      | 0.1894 |

**Table S2.** Equilibrium adsorption concentration ( $C_e$ ), saturated adsorption capacity ( $Q$ ), and adsorption efficiency ( $\eta$ ) under different initial  $\text{Hg}^{2+}$  concentrations ( $C_i$ ).

| $C_i$ [mM] | $C_e$ [mM] | $Q$ [mmol·g <sup>-1</sup> ] | $\eta$ [%] |
|------------|------------|-----------------------------|------------|
| 0.1        | 0.00117    | 0.01977                     | 98.83      |
| 0.3        | 0.00886    | 0.05823                     | 97.05      |
| 0.5        | 0.02788    | 0.09443                     | 94.42      |
| 1          | 0.08215    | 0.18357                     | 91.79      |
| 2          | 0.64450    | 0.27110                     | 67.78      |
| 3          | 1.45620    | 0.30876                     | 51.46      |
| 4          | 2.44560    | 0.31088                     | 38.86      |

**Table S3.** Different parameters value of isotherms models at the same temperature.

| Isotherm model | Parameters | Values  |
|----------------|------------|---------|
| Langmuir       | $Q_m$      | 0.3123  |
|                | $K_L$      | 17.2777 |
|                | $R^2$      | 0.989   |
| Freundlich     | $K_F$      | 0.2719  |
|                | $n$        | 3.9493  |
|                | $R^2$      | 0.933   |

**Table S4.** Comparison of detection and adsorption performance of various functional materials simultaneously featuring Hg<sup>2+</sup> detection and adsorption abilities.

| Materials                                        | Adsorption capacity | Adsorption time                     | Detection range    | Detection limit | Refs      |
|--------------------------------------------------|---------------------|-------------------------------------|--------------------|-----------------|-----------|
| Cysteamine-functionalized photonic gel           | 62.7 mg/g           | 2 h                                 | 0.1nM-10 μM        | 0.3 nM          | This work |
| Thioether-based fluorescent COF                  | Not given           | Not given                           | 0.125 μM - 33.3 μM | 0.125 μM        | Ref.1     |
| Luminescent MOF                                  | 380 mg/g            | The removal rate is 99.1% in 30 min | 16 nM-19.6 μM      | 16 nM           | Ref.2     |
| Al-MOF based on thione derivatives               | 1110 mg/g           |                                     | 2 nM-2.1 μM        | 4 nM            | Ref.3     |
| Thiourea functionalized 1D photonic crystal film | 739.6 mg/g          | 12 h                                | 1 nM-800 μM        | 1 nM            | Ref.4     |
| Fluorescence probe on mesoporous silica          | 482 mg/g            | 3 h                                 | 0.185 μM-100 μM    | 0.185 μM        | Ref.5     |
| Fluorescent supramolecular polymer               | Not given           | 12 h                                | 0.3 μM-15 μM       | 0.3 μM          | Ref.6     |

## References

1. S.-Y. Ding, M. Dong, Y.-W. Wang, Y.-T. Chen, H.-Z. Wang, C.-Y. Su and W. Wang, *Journal of the American Chemical Society*, 2016, **138**, 3031-3037.
2. N. D. Rudd, H. Wang, E. M. A. Fuentes-Fernandez, S. J. Teat, F. Chen, G. Hall, Y. J. Chabal and J. Li, *ACS Applied Materials & Interfaces*, 2016, **8**, 30294-30303.
3. A. Radwan, I. M. El-Sewify, A. Shahat, H. M. E. Azzazy, M. M. H. Khalil and M. F. El-Shahat, *Acs Sustainable Chemistry & Engineering*, 2020, **8**, 15097-15107.
4. D. H. Kou, W. Ma and S. F. Zhang, *Advanced Functional Materials*, 2021, **31**, 2007032.
5. S. Chatterjee, H. Gohil, I. Raval, S. Chatterjee and A. R. Paital, *Small*, 2019, **15**, 1804749.
6. D. Dai, Z. Li, J. Yang, C. Wang, J.-R. Wu, Y. Wang, D. Zhang and Y.-W. Yang, *Journal of the American Chemical Society*, 2019, **141**, 4756-4763.
